# Supplementary material for: Daytime driving decreases amphibian roadkill
Source: PeerJ. 2018 Aug 3;6:e5385. doi: 10.7717/peerj.5385 (PMC6078066; doi:10.7717/peerj.5385)
Supplement: Supplemental Information 1 [file peerj-06-5385-s001.xls]

## Sheet: Road-kill data of amphibians
Supplemental materials1-The original road-kill data of amphibians in Wanglang NNR from 2015 to 2017
Date	Species	SVL(mm)	latitude(°)	longitude(°)	elevation(m)
2015-06-10	Bufo andrewsi	96.36	32.9691	104.105	2589
2015-06-10	Bufo andrewsi	99.44	32.9668	104.115	2577
2015-06-10	Bufo andrewsi	85.78	32.9668	104.115	2577
2015-06-10	Bufo andrewsi	79.22	32.9661	104.118	2553
2015-06-10	Bufo andrewsi	53.67	32.9607	104.119	2566
2015-06-10	Bufo andrewsi	96.58	32.9595	104.12	2555
2015-06-10	Bufo andrewsi	92.41	32.9588	104.12	2548
2015-06-10	Bufo andrewsi	50.82	32.9582	104.12	2555
2015-06-10	Bufo andrewsi	80.05	32.9571	104.129	2561
2015-06-10	Bufo andrewsi	67.4	32.9565	104.121	2544
2015-06-10	Bufo andrewsi	75.18	32.9545	104.125	2531
2015-06-10	Bufo andrewsi	43.42	32.9543	104.125	2529
2015-06-10	Bufo andrewsi	59.67	32.9485	104.132	2527
2015-06-10	Bufo andrewsi	43.2	32.9473	104.134	2517
2015-06-10	Bufo andrewsi	58.26	32.9436	104.136	2501
2015-06-10	Bufo andrewsi	31.52	32.9423	104.139	2513
2015-06-10	Bufo andrewsi	83.97	32.9278	104.145	2487
2015-06-10	Bufo andrewsi	72.25	32.9266	104.148	2469
2015-06-10	Bufo andrewsi	56.63	32.9238	104.149	2473
2015-06-10	Bufo andrewsi	51.08	32.9238	104.149	2473
2015-06-10	Bufo andrewsi	64.14	32.9236	104.149	2469
2015-06-10	Bufo andrewsi	63.81	32.9108	104.152	2453
2015-06-10	Bufo andrewsi	49.02	32.9122	104.155	2458
2015-06-10	Bufo andrewsi	87.11	32.9121	104.155	2459
2015-06-10	Bufo andrewsi	64.38	32.9113	104.155	2460
2015-06-10	Bufo andrewsi	35.01	32.9103	104.155	2467
2015-06-10	Rana chensinensis	21.73	32.9103	104.155	2465
2015-06-11	Bufo andrewsi	52.96	32.9689	104.107	2580
2015-06-11	Bufo andrewsi	60.02	32.9669	104.113	2561
2015-06-11	Bufo andrewsi	121.28	32.9646	104.118	2556
2015-06-11	Bufo andrewsi	55.13	32.9627	104.118	2544
2015-06-11	Bufo andrewsi	51.16	32.9625	104.118	2547
2015-06-11	Bufo andrewsi	68.3	32.9539	104.125	2542
2015-06-11	Rana chensinensis	49.04	32.9495	104.13	2532
2015-06-11	Bufo andrewsi	86.79	32.9425	104.138	2511
2015-06-11	Bufo andrewsi	83.41	32.9368	104.138	2524
2015-06-11	Bufo andrewsi	68.07	32.9368	104.138	2513
2015-06-11	Bufo andrewsi	91.19	32.926	104.146	2474
2015-06-11	Bufo andrewsi	62.3	32.9264	104.147	2472
2015-06-11	Bufo andrewsi	91.93	32.9266	104.148	2479
2015-06-11	Bufo andrewsi	82.56	32.9257	104.149	2469
2015-06-11	Bufo andrewsi	74.94	32.9252	104.149	2464
2015-06-11	Bufo andrewsi	72.76	32.9238	104.149	2463
2015-06-11	Bufo andrewsi	77.11	32.9232	104.15	2472
2015-06-11	Bufo andrewsi	78.23	32.9233	104.15	2472
2015-06-11	Bufo andrewsi	39.09	32.9207	104.151	2468
2015-06-11	Bufo andrewsi	64.38	32.9169	104.152	2459
2015-06-11	Bufo andrewsi	70.43	32.9169	104.152	2459
2015-06-11	Bufo andrewsi	66.2	32.9164	104.152	2450
2015-06-11	Bufo andrewsi	90.41	32.9155	104.153	2451
2015-06-11	Bufo andrewsi	61.96	32.9135	104.155	2451
2015-06-11	Bufo andrewsi	59.09	32.91	104.156	2469
2015-06-11	Bufo andrewsi	37.86	32.9098	104.156	2465
2015-06-11	Bufo andrewsi	69.78	32.9097	104.156	2462
2015-06-12	N/A	N/A	N/A	N/A	N/A
2015-06-13	Bufo andrewsi	90.61	32.96698°	104.11354°	2561
2015-06-13	Bufo andrewsi	75.92	N32.95830	104.12	2555
2015-06-13	Bufo andrewsi	57.62	32.9564	104.121	2538
2015-06-13	Rana chensinensis	36.82	32.9518	104.128	2534
2015-06-13	Bufo andrewsi	82.51	32.9426	104.138	2500
2015-06-13	Rana chensinensis	36.41	32.9372	104.138	2495
2015-06-13	Bufo andrewsi	71.73	32.9341	104.141	2488
2015-06-13	Bufo andrewsi	82.99	32.9266	104.148	2471
2015-06-13	Bufo andrewsi	62.17	32.9204	104.151	2460
2015-06-13	Bufo andrewsi	87.59	32.9198	104.151	2466
2015-06-13	Bufo andrewsi	52.88	32.9182	104.152	2451
2015-06-13	Rana chensinensis	32.06	32.9152	104.154	2449
2015-06-14	Bufo andrewsi	41.48	32.9458	104.137	2517
2015-06-14	Bufo andrewsi	73.43	32.9381	104.138	2490
2015-06-14	Bufo andrewsi	94.58	32.9261	104.146	2476
2015-06-15	N/A	N/A	N/A	N/A	N/A
2015-06-16	Bufo andrewsi	70.79	32.9669	104.114	2557
2015-06-16	Bufo andrewsi	52.67	32.9666	104.116	2557
2015-06-16	Bufo andrewsi	59.08	32.9665	104.117	2545
2015-06-16	Bufo andrewsi	58.18	32.962	104.119	2541
2015-06-16	Bufo andrewsi	62.97	32.9614	104.119	2551
2015-06-16	Rana chensinensis	49.29	32.96	104.12	2550
2015-06-16	Bufo andrewsi	67.04	32.9564	104.122	2555
2015-06-16	Rana chensinensis	39.97	32.9555	104.123	2531
2015-06-16	Rana chensinensis	51.2	32.955	104.124	2525
2015-06-16	Bufo andrewsi	90.29	32.9522	104.127	2538
2015-06-16	Bufo andrewsi	76.8	32.9521	104.128	2539
2015-06-16	Bufo andrewsi	54.47	32.9521	104.128	2539
2015-06-16	Bufo andrewsi	54.23	32.9481	104.132	2542
2015-06-16	Bufo andrewsi	49.94	32.9483	104.133	2529
2015-06-16	Bufo andrewsi	59.62	32.9482	104.133	2525
2015-06-16	Bufo andrewsi	68.46	32.948	104.133	2542
2015-06-16	Bufo andrewsi	86.98	32.9472	104.135	2521
2015-06-16	Rana chensinensis	33.63	32.9439	104.137	2497
2015-06-16	Bufo andrewsi	85.84	32.9422	104.139	2505
2015-06-16	Bufo andrewsi	72.16	32.9374	104.138	2493
2015-06-16	Bufo andrewsi	53.98	32.9361	104.139	2496
2015-06-16	Bufo andrewsi	72.62	32.9346	104.14	2483
2015-06-16	Bufo andrewsi	68.66	32.9346	104.14	2483
2015-06-16	Bufo andrewsi	68.6	32.9347	104.141	2489
2015-06-16	Bufo andrewsi	56.53	32.9299	104.144	2492
2015-06-16	Bufo andrewsi	62.91	32.9297	104.144	2481
2015-06-16	Bufo andrewsi	56.29	32.9274	104.145	2482
2015-06-16	Bufo andrewsi	94.05	32.9262	104.146	2489
2015-06-16	Bufo andrewsi	82.53	32.9267	104.148	2468
2015-06-16	Bufo andrewsi	74.23	32.9267	104.148	2468
2015-06-16	Bufo andrewsi	44.29	32.9265	104.149	2466
2015-06-16	Bufo andrewsi	54.78	32.9261	104.149	2466
2015-06-16	Bufo andrewsi	66.35	32.9248	104.149	2467
2015-06-16	Bufo andrewsi	88.22	32.9244	104.149	2469
2015-06-16	Rana chensinensis	49.35	32.9241	104.149	2465
2015-06-16	Rana chensinensis	47.88	32.9238	104.149	2471
2015-06-16	Bufo andrewsi	64.3	32.9203	104.15	2461
2015-06-16	Bufo andrewsi	62.84	32.9174	104.152	2448
2015-06-16	Bufo andrewsi	63.29	32.9174	104.152	2448
2015-06-16	Bufo andrewsi	84.96	32.9174	104.152	2448
2015-06-16	Bufo andrewsi	52.62	32.9169	104.152	2458
2015-06-16	Bufo andrewsi	59.51	32.916	104.153	2451
2015-06-16	Bufo andrewsi	59.46	32.9156	104.153	2446
2015-06-16	Bufo andrewsi	64.13	32.9149	104.154	2445
2015-06-16	Bufo andrewsi	81.04	32.9131	104.155	2484
2015-06-16	Bufo andrewsi	76.48	32.9127	104.155	2460
2015-08-10	Bufo andrewsi	43.55	32.9629	104.118	2546
2015-08-10	Rana chensinensis	23.81	32.9623	104.118	2549
2015-08-10	Bufo andrewsi	43.98	32.9539	104.125	2542
2015-08-10	Bufo andrewsi	94.24	32.9522	104.127	2523
2015-08-10	Rana chensinensis	35.02	32.9504	104.129	2523
2015-08-10	Bufo andrewsi	100.56	32.9503	104.129	2522
2015-08-11	Bufo andrewsi	92.05	32.9691	104.106	2570
2015-08-11	Rana chensinensis	28.34	32.9549	104.124	2539
2015-08-11	Bufo andrewsi	81.74	32.9374	104.138	2508
2015-08-11	Bufo andrewsi	41.83	32.9335	104.141	2483
2015-08-11	Bufo andrewsi	63.65	32.9228	104.149	2474
2015-08-11	Bufo andrewsi	62.77	32.9227	104.149	2470
2015-08-11	Bufo andrewsi	54.11	32.9217	104.149	2463
2015-08-12	Bufo andrewsi	62.08	32.9657	104.118	2549
2015-08-12	Bufo andrewsi	52.22	32.9559	104.122	2554
2015-08-12	Bufo andrewsi	36.48	32.9528	104.127	2528
2015-08-12	Bufo andrewsi	56.61	32.9459	104.137	2516
2015-08-12	Bufo andrewsi	53.45	32.9197	104.151	2459
2015-08-12	Bufo andrewsi	50.89	32.9195	104.151	2454
2015-08-12	Bufo andrewsi	88.92	32.9162	104.153	2449
2015-08-13	Rana chensinensis	22.73	32.927	104.145	2484
2015-08-14	Bufo andrewsi	94.53	32.9221	104.149	2488
2015-08-15	Rana chensinensis	55.56	32.9668	104.115	2520
2015-08-15	Bufo andrewsi	86.54	32.9131	104.155	2461
2015-08-16	N/A	N/A	N/A	N/A	N/A
2016-06-13	Bufo andrewsi	85.84	32.9664	104.118	2551
2016-06-13	Bufo andrewsi	105.98	32.9557	104.123	2536
2016-06-14	Bufo andrewsi	75.12	32.9638	104.118	2546
2016-06-14	Bufo andrewsi	43	32.9427	104.138	2506
2016-06-14	Bufo andrewsi	104.98	32.9263	104.146	2473
2016-06-14	Bufo andrewsi	43.7	32.9264	104.149	2471
2016-06-14	Bufo andrewsi	73.46	32.926	104.149	2474
2016-06-14	Bufo andrewsi	67.56	32.9175	104.152	2444
2016-06-14	Bufo andrewsi	43.38	32.9147	104.154	2451
2016-06-14	Bufo andrewsi	46.4	32.912	104.155	2485
2016-06-14	Bufo andrewsi	57.8	32.911	104.155	2461
2016-06-14	Bufo andrewsi	63.11	32.9108	104.155	2462
2016-06-14	Bufo andrewsi	85.41	32.9103	104.155	2468
2016-06-15	Bufo andrewsi	36.77	32.9575	104.121	2553
2016-06-15	Bufo andrewsi	87.09	32.926	104.146	2477
2016-06-15	Bufo andrewsi	85.47	32.9265	104.148	2471
2016-06-15	Bufo andrewsi	70.3	32.9121	104.155	2456
2016-06-15	Bufo andrewsi	59.78	32.9098	104.156	2470
2016-06-16	Bufo andrewsi	70.13	32.9468	104.136	2526
2016-06-17	Bufo andrewsi	68.92	32.9626	104.118	2544
2016-06-17	Bufo andrewsi	70.36	32.9605	104.119	2550
2016-06-18	Bufo andrewsi	86.51	32.9264	104.149	2473
2016-06-18	Bufo andrewsi	48.85	32.9235	104.149	2458
2016-06-18	Bufo andrewsi	59.64	32.9121	104.155	2462
2016-06-19	Bufo andrewsi	92.07	32.9256	104.149	2472
2016-06-19	Bufo andrewsi	59.86	32.9231	104.15	2461
2016-06-19	Rana chensinensis	37.71	32.9214	104.15	2459
2016-06-19	Bufo andrewsi	74.26	32.9187	104.152	2460
2016-06-19	Bufo andrewsi	60.72	32.9174	104.152	2454
2016-06-19	Bufo andrewsi	72.98	32.9138	104.155	2448
2016-06-19	Bufo andrewsi	68.77	32.9121	104.155	2457
2016-08-15	Bufo andrewsi	34.64	32.9689	104.109	2571
2016-08-15	Rana chensinensis	58.23	32.9633	104.118	2567
2016-08-15	Bufo andrewsi	60.99	32.9349	104.14	2496
2016-08-15	Bufo andrewsi	46.6	32.9251	104.149	2474
2016-08-15	Bufo andrewsi	44.85	32.9172	104.152	2432
2016-08-15	Bufo andrewsi	83.08	32.913	104.155	2446
2016-08-16	Rana chensinensis	49.01	32.9676	104.113	2538
2016-08-16	Bufo andrewsi	39.63	32.9666	104.117	2551
2016-08-16	Bufo andrewsi	46.11	32.9593	104.12	2554
2016-08-17	N/A	N/A	N/A	N/A	N/A
2016-08-18	Rana chensinensis	48.43	32.9497	104.13	2524
2016-08-18	Bufo andrewsi	53.75	32.9438	104.137	2508
2016-08-18	Bufo andrewsi	49.28	32.9432	104.137	2502
2016-08-18	Bufo andrewsi	83.14	32.9431	104.137	2503
2016-08-18	Bufo andrewsi	71.87	32.9262	104.149	2467
2016-08-18	Bufo andrewsi	53.41	32.9259	104.149	2470
2016-08-18	Bufo andrewsi	55.29	32.9215	104.15	2466
2016-08-18	Bufo andrewsi	66.69	32.9142	104.154	2459
2016-08-18	Bufo andrewsi	51.52	32.9148	104.154	2463
2016-08-19	Rana chensinensis	49.27	32.9591	104.12	2545
2016-08-19	Bufo andrewsi	53.18	32.9534	104.126	2538
2016-08-19	Rana chensinensis	40.62	32.9513	104.128	2539
2016-08-19	Bufo andrewsi	48.48	32.9491	104.133	2533
2016-08-19	Bufo andrewsi	63.25	32.9143	104.154	2443
2016-08-19	Bufo andrewsi	73.77	32.9114	104.155	2457
2016-08-20	Bufo andrewsi	78.4	32.9684	104.11	2556
2016-08-20	Bufo andrewsi	88	32.9679	104.111	2565
2016-08-20	Bufo andrewsi	57.64	32.9678	104.221	2594
2016-08-20	Bufo andrewsi	98.13	32.9674	104.112	2584
2016-08-20	Bufo andrewsi	106.07	32.9658	104.118	2538
2016-08-20	Bufo andrewsi	59.86	32.956	104.122	2542
2016-08-20	Rana chensinensis	40.54	32.9335	104.142	2498
2016-08-20	Bufo andrewsi	73.39	32.9204	104.151	2450
2016-08-21	Rana chensinensis	34.14	32.9684	104.11	2602
2016-08-21	Bufo andrewsi	71.69	32.9683	104.111	2562
2016-08-21	Rana chensinensis	48.5	32.9669	104.114	2559
2016-08-21	Bufo andrewsi	76.06	32.956	104.122	2541
2016-08-21	Bufo andrewsi	71.06	32.9469	104.136	2520
2016-08-21	Bufo andrewsi	65.03	32.9398	104.137	2507
2016-08-21	Bufo andrewsi	44.41	32.9287	104.145	2482
2016-08-21	Bufo andrewsi	73.16	32.9182	104.152	2447
2017-04-03	N/A	N/A	N/A	N/A	N/A
2017-04-04	Bufo andrewsi	95.08	32.9336	104.141	2485
2017-04-04	Rana chensinensis	40.16	32.9483	104.132	2529
2017-04-05	N/A	N/A	N/A	N/A	N/A
2017-04-06	Bufo andrewsi	78.56	32.9691	104.104	2572
2017-04-06	Bufo andrewsi	65.48	32.9691	104.104	2572
2017-04-06	Bufo andrewsi	92.51	32.9691	104.104	2572
2017-04-06	Bufo andrewsi	83.83	32.957	104.121	2451
2017-04-06	Bufo andrewsi	74.29	32.9132	104.155	2453
2017-04-07	Rana chensinensis	35.26	32.9689	104.102	2552
2017-04-07	Bufo andrewsi	110.15	32.9557	104.122	2558
2017-04-08	Bufo andrewsi	76.56	32.968	104.111	2570
2017-04-08	Rana chensinensis	39.59	32.9673	104.113	2556
2017-04-08	Bufo andrewsi	84.89	32.9671	104.112	2538
2017-04-08	Rana chensinensis	42.13	32.962	104.118	2550
2017-04-08	Bufo andrewsi	78.09	32.9556	104.123	2535
2017-04-08	Rana chensinensis	53.69	32.9476	104.134	2523
2017-04-08	Bufo andrewsi	53.55	32.9224	104.149	2476
2017-04-09	Rana chensinensis	51.85	32.9691	104.104	2574
2017-04-09	Rana chensinensis	41.93	32.9692	104.105	2579
2017-04-09	Rana chensinensis	54.07	32.9691	104.108	2562
2017-04-09	Rana chensinensis	39.88	32.9686	104.109	2589
2017-04-09	Rana chensinensis	42.3	32.9686	104.11	2554
2017-04-09	Rana chensinensis	46.38	32.9683	104.111	2567
2017-04-09	Rana chensinensis	56.11	32.968	104.111	2558
2017-04-09	Bufo andrewsi	68.63	32.9259	104.15	2557
2017-05-08	N/A	N/A	N/A	N/A	N/A
2017-05-09	N/A	N/A	N/A	N/A	N/A
2017-05-10	Bufo andrewsi	59.55	32.9224	104.149	2461
2017-05-11	N/A	N/A	N/A	N/A	N/A
2017-05-12	Rana chensinensis	56.77	32.969	104.11	2494
2017-05-13	N/A	N/A	N/A	N/A	N/A
2017-05-14	Bufo andrewsi	67.09	32.9682	104.111	2564
2017-05-14	Bufo andrewsi	80.22	32.9612	104.119	2535
2017-05-14	Bufo andrewsi	90.92	32.9235	104.149	2464
2017-05-14	Bufo andrewsi	90.96	32.9219	104.149	2464
2017-05-14	Bufo andrewsi	39.14	32.9099	104.156	2455
2017-06-24	Bufo andrewsi	63.12	32.962	104.119	2526
2017-06-24	Bufo andrewsi	53.64	32.9549	104.124	2550
2017-06-24	Bufo andrewsi	62.62	32.9345	104.14	2491
2017-06-24	Bufo andrewsi	49.23	32.9333	104.141	2493
2017-06-25	Bufo andrewsi	55.06	32.9611	104.119	2563
2017-06-25	Bufo andrewsi	58.82	32.9519	104.128	2528
2017-06-25	Bufo andrewsi	55.37	32.9339	104.141	2519
2017-06-25	Bufo andrewsi	63.26	32.9311	104.143	2486
2017-06-25	Bufo andrewsi	56.63	32.9232	104.15	2495
2017-06-26	N/A	N/A	N/A	N/A	N/A
2017-06-28	Bufo andrewsi	71.17	32.9644	104.118	2540
2017-06-28	Bufo andrewsi	42.06	32.9609	104.119	2558
2017-06-28	Bufo andrewsi	53	32.9499	104.13	2533
2017-06-28	Bufo andrewsi	38.41	32.9345	104.14	2484
2017-06-28	Bufo andrewsi	47.44	32.9232	104.15	2479
2017-06-28	Bufo andrewsi	62.77	32.9132	104.155	2450
2017-06-28	Rana chensinensis	16.58	32.9113	104.155	2495
2017-06-29	N/A	N/A	N/A	N/A	N/A
2017-06-30	Bufo andrewsi	53.37	32.9457	104.137	2512
2017-07-16	Bufo andrewsi	72.63	32.9676	104.112	2547
2017-07-16	Bufo andrewsi	92.86	32.9654	104.118	2539
2017-07-16	Bufo andrewsi	53.63	32.9567	104.121	2573
2017-07-16	Bufo andrewsi	105.65	32.9532	104.126	2534
2017-07-16	Bufo andrewsi	65.98	32.9432	104.137	2505
2017-07-17	Bufo andrewsi	92.8	32.9617	104.119	2571
2017-07-17	Bufo andrewsi	80.1	32.9448	104.136	2511
2017-07-18	N/A	N/A	N/A	N/A	N/A
2017-07-19	Bufo andrewsi	69.5	32.9602	104.12	2524
2017-07-19	Bufo andrewsi	83.22	32.9534	104.126	2539
2017-07-19	Bufo andrewsi	66.4	32.9425	104.138	2502
2017-07-20	N/A	N/A	N/A	N/A	N/A
2017-07-21	Bufo andrewsi	69.86	32.9689	104.109	2513
2017-07-21	Bufo andrewsi	66.98	32.9683	104.111	2566
2017-07-21	Bufo andrewsi	72.15	32.9665	104.117	2565
2017-07-21	Bufo andrewsi	47.46	32.9549	104.124	2533
2017-07-21	Bufo andrewsi	88.02	32.9534	104.126	2543
2017-07-21	Bufo andrewsi	60.36	32.9118	104.155	2459
2017-07-21	Rana chensinensis	32.23	32.9104	104.155	2466
2017-07-22	N/A	N/A	N/A	N/A	N/A
2017-08-06	Bufo andrewsi	59.19	32.9681	104.112	2563
2017-08-07	N/A	N/A	N/A	N/A	N/A
2017-08-08	Bufo andrewsi	68.43	32.9482	104.133	2523
2017-08-08	Bufo andrewsi	31.26	32.9109	104.155	2462
2017-08-09	N/A	N/A	N/A	N/A	N/A
2017-08-10	Bufo andrewsi	65.87	32.9312	104.143	2479
2017-08-11	N/A	N/A	N/A	N/A	N/A
2017-08-12	Bufo andrewsi	72.55	32.9691	104.105	2588
2017-08-12	Bufo andrewsi	69.34	32.969	104.106	2592
2017-08-12	Bufo andrewsi	31.66	32.9689	104.106	2618
2017-08-12	Rana chensinensis	57.53	32.9678	104.112	2561
2017-08-12	Bufo andrewsi	31.45	32.9668	104.116	2533
2017-08-12	Rana chensinensis	43.43	32.9429	104.138	2507
2017-08-12	Bufo andrewsi	80.67	32.9426	104.138	2499
2017-08-12	Bufo andrewsi	37.44	32.9395	104.14	2525
2017-08-12	Bufo andrewsi	71	32.9315	104.142	2485
2017-08-12	Bufo andrewsi	47.61	32.9218	104.15	2453
2017-09-22	N/A	N/A	N/A	N/A	N/A
2017-09-23	Bufo andrewsi	102.56	32.9255	104.149	2495
2017-09-24	N/A	N/A	N/A	N/A	N/A
2017-09-25	Bufo andrewsi	45.48	32.9266	104.148	2461
2017-09-25	Bufo andrewsi	89.15	32.9266	104.148	2450
2017-09-26	Bufo andrewsi	87.59	32.9357	104.139	2474
2017-09-26	Bufo andrewsi	95.1	32.9263	104.145	2512
2017-09-27	Bufo andrewsi	79.91	32.9473	104.135	2532
2017-09-28	N/A	N/A	N/A	N/A	N/A
2017-10-13	N/A	N/A	N/A	N/A	N/A
2017-10-14	Rana chensinensis	29.61	32.9589	104.12	2504
2017-10-14	Bufo andrewsi	26.69	32.9409	104.138	2528
2017-10-14	Rana chensinensis	54.38	32.922	104.149	2469
2017-10-15	N/A	N/A	N/A	N/A	N/A
2017-10-16	N/A	N/A	N/A	N/A	N/A
2017-10-17	N/A	N/A	N/A	N/A	N/A
2017-10-18	N/A	N/A	N/A	N/A	N/A
2017-10-19	N/A	N/A	N/A	N/A	N/A
